# Supplementary material
Source: PubMed Central journal article supplement (PMC6423425)
Supplement: hmg-2018-d-00737_figure_s1_revised_ddy400.pdf [file hmg-2018-d-00737_figure_s1_revised_ddy400.pdf]

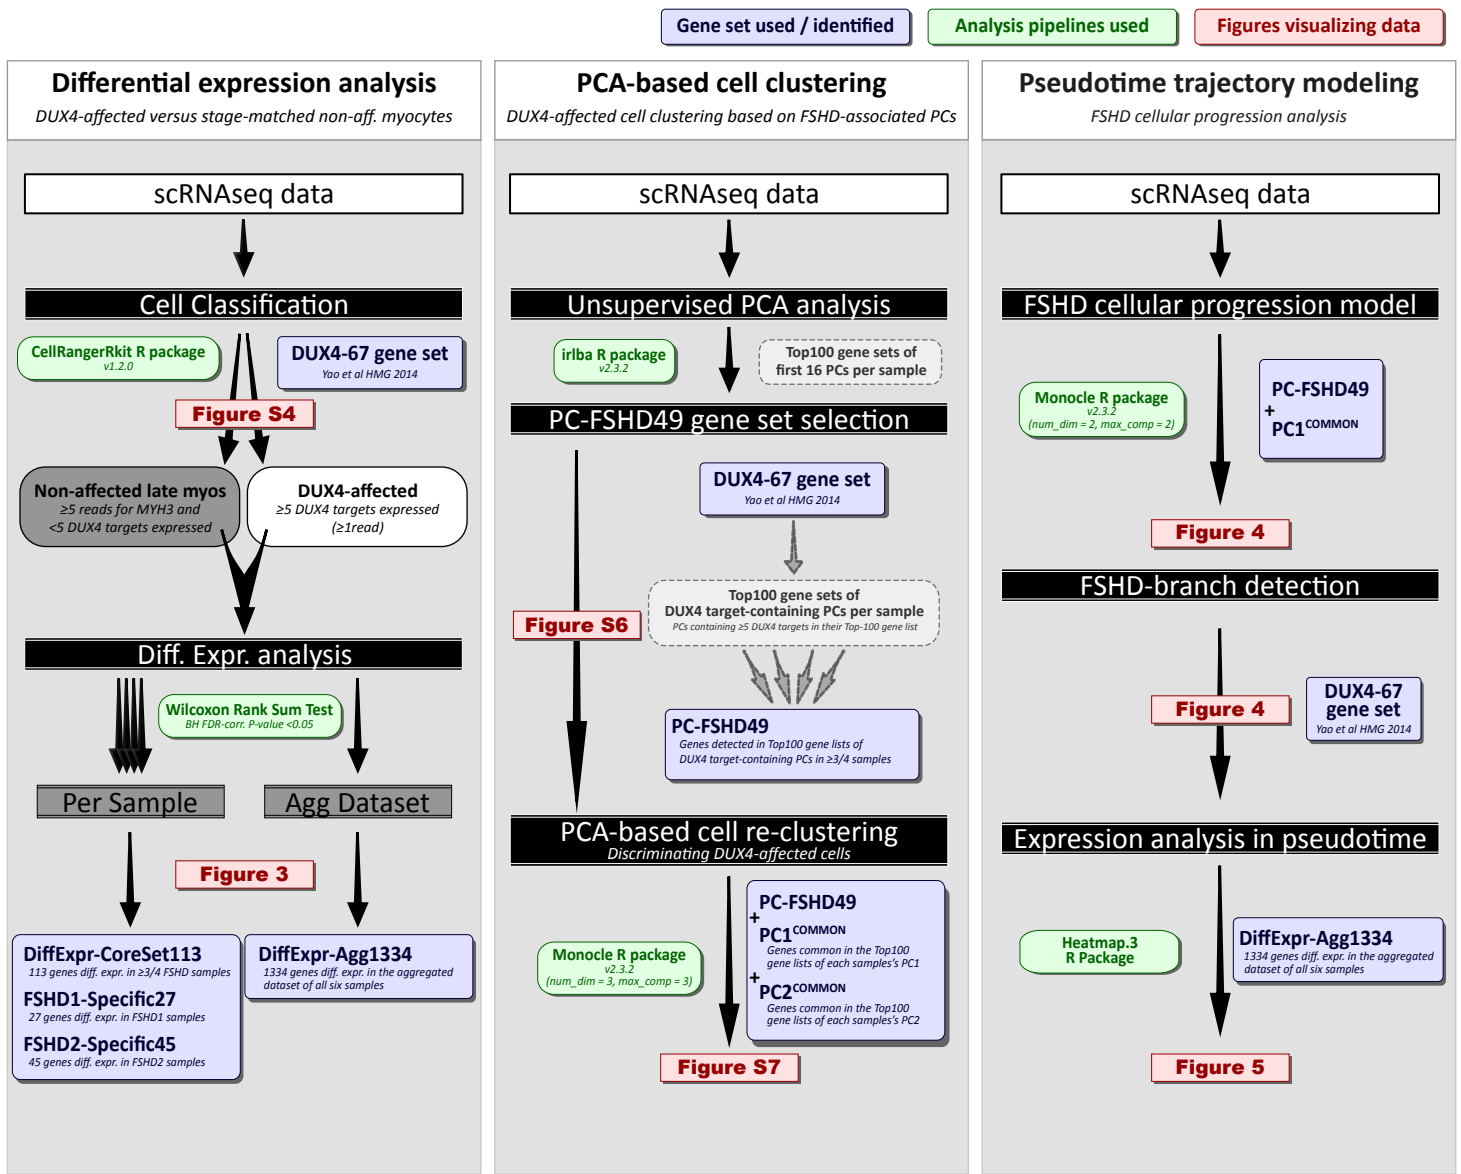

**Figure S1. Schematic overview of all analyses performed in this study.**

Highlighted are the gene sets used and/or identified with each analysis (in blue), the analysis tools and/or pipelines used (in green) and the figures in the manuscript depicting the results of the analysis (in red).
