# Supplementary material
Source: PubMed Central journal article supplement (PMC6423425)
Supplement: hmg-2018-d-00737_figure_s2_revised_ddy400.pdf [file hmg-2018-d-00737_figure_s2_revised_ddy400.pdf]

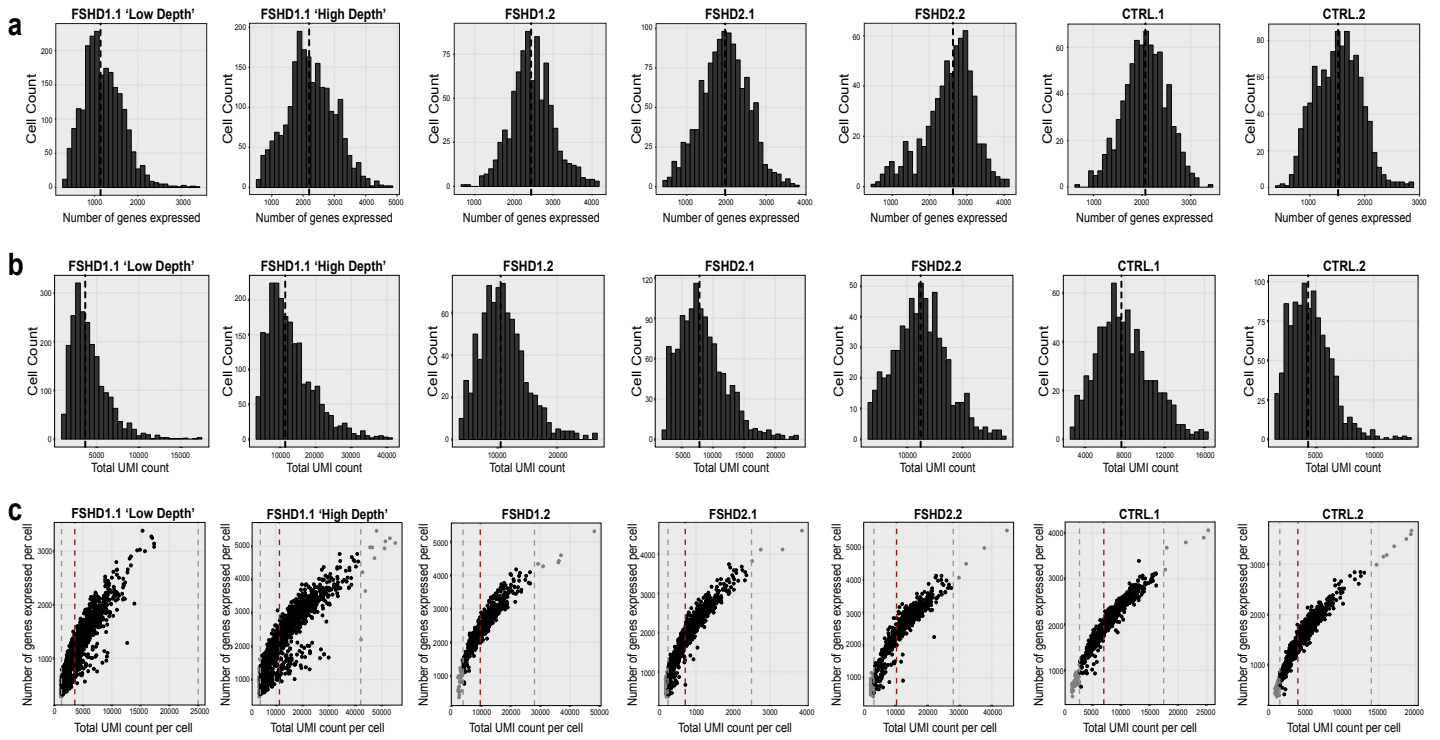

**Figure S2. Detailed scRNAseq quality validation per sample.**

Single-cell sequencing metrics per sample, with **a**) a histogram depicting the distribution of the number of expressed genes per cell (dashed line; median); **b**) a histogram depicting the distribution of the total UMI counts per cell (dashed line; median); **c**) a scatterplot depicting the relation of total UMI counts versus total gene counts per cell (red dashed line; mean UMI counts per cell, grey dashed lines; selected threshold for filtering low quality cells per sample, grey dots; filtered low quality cells).
