# Supplementary material
Source: PubMed Central journal article supplement (PMC6423425)
Supplement: hmg-2018-d-00737_figure_s3_revised_ddy400.pdf [file hmg-2018-d-00737_figure_s3_revised_ddy400.pdf]

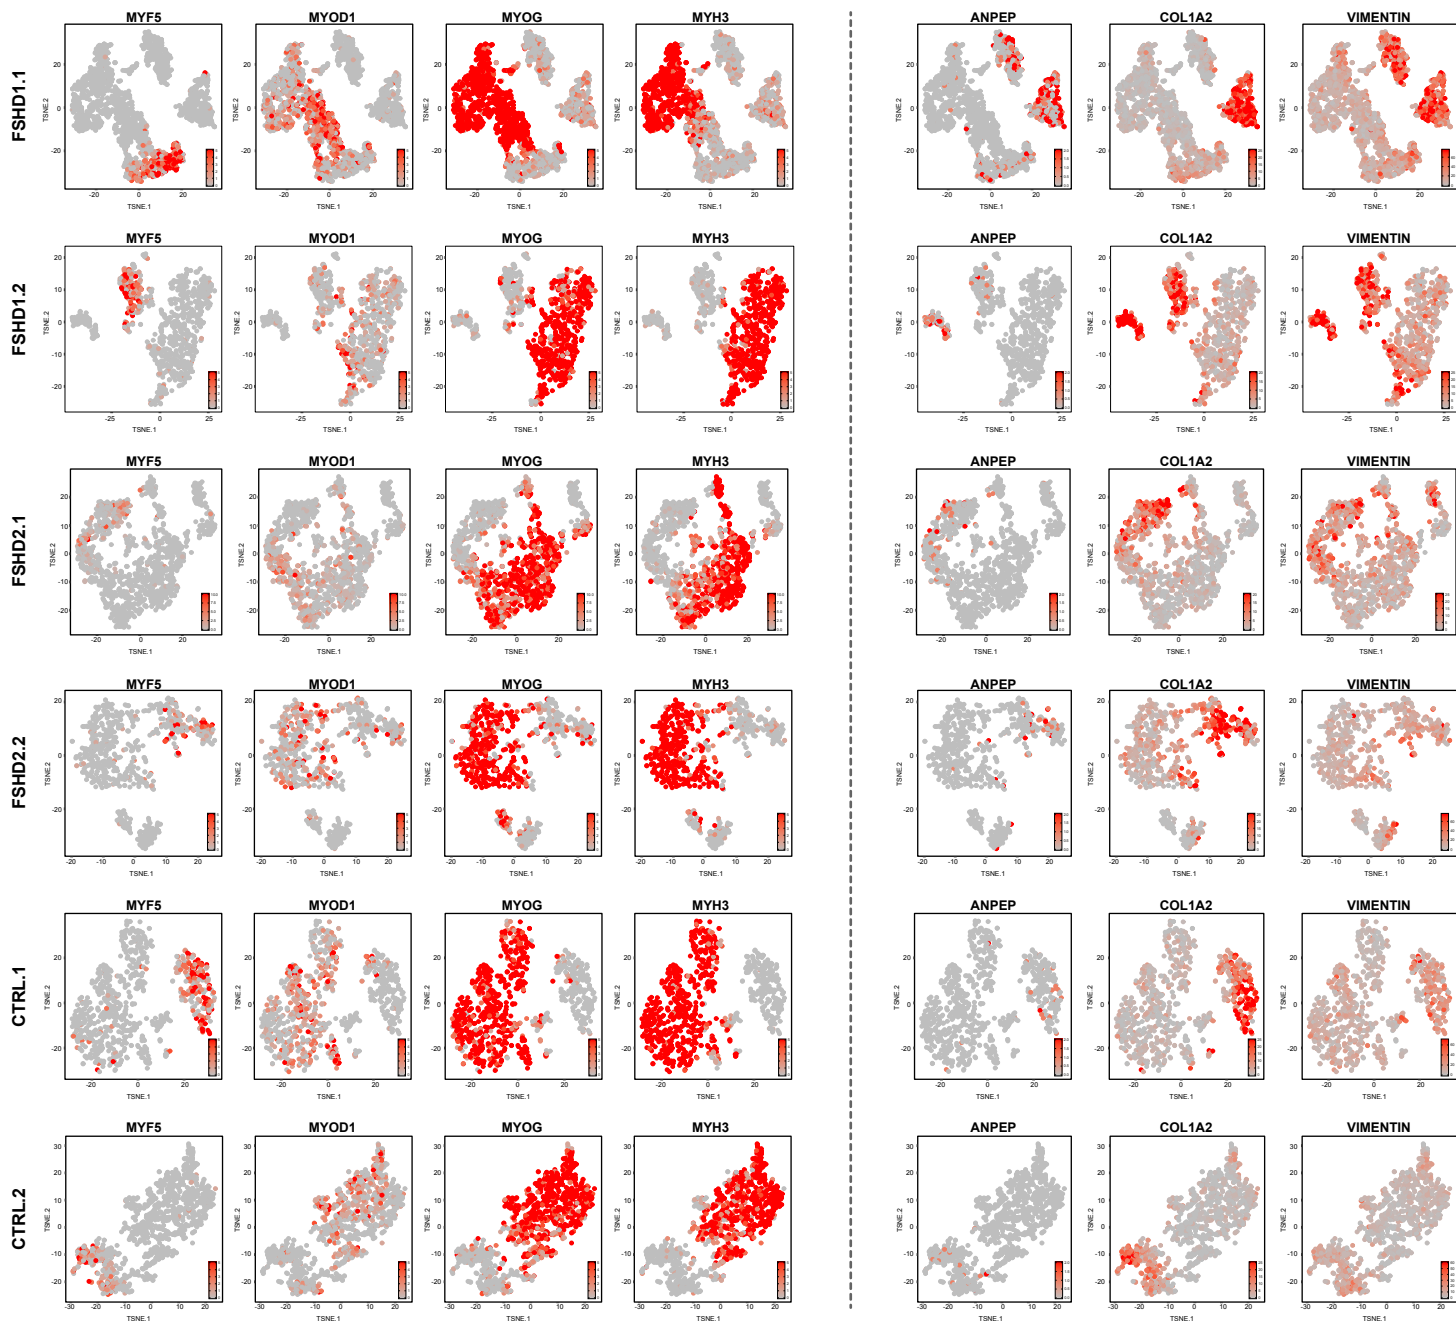

**Figure S3. Expression patterns of myogenic markers per sample.**

t-SNE projections (Cell Ranger) of all six samples, colored based on the expression levels of four myogenic markers; MYF5 (early marker), MYOD1 (intermediate marker), MYOG (intermediate-late marker) and MYH3 (late marker), and three fibroblast markers; ANPEP, COL1A2 and Vimentin. Color-scales depict the normalized expression levels for each specified gene.
