# Supplementary material
Source: PubMed Central journal article supplement (PMC6423425)
Supplement: hmg-2018-d-00737_figure_s4_revised_ddy400.pdf [file hmg-2018-d-00737_figure_s4_revised_ddy400.pdf]

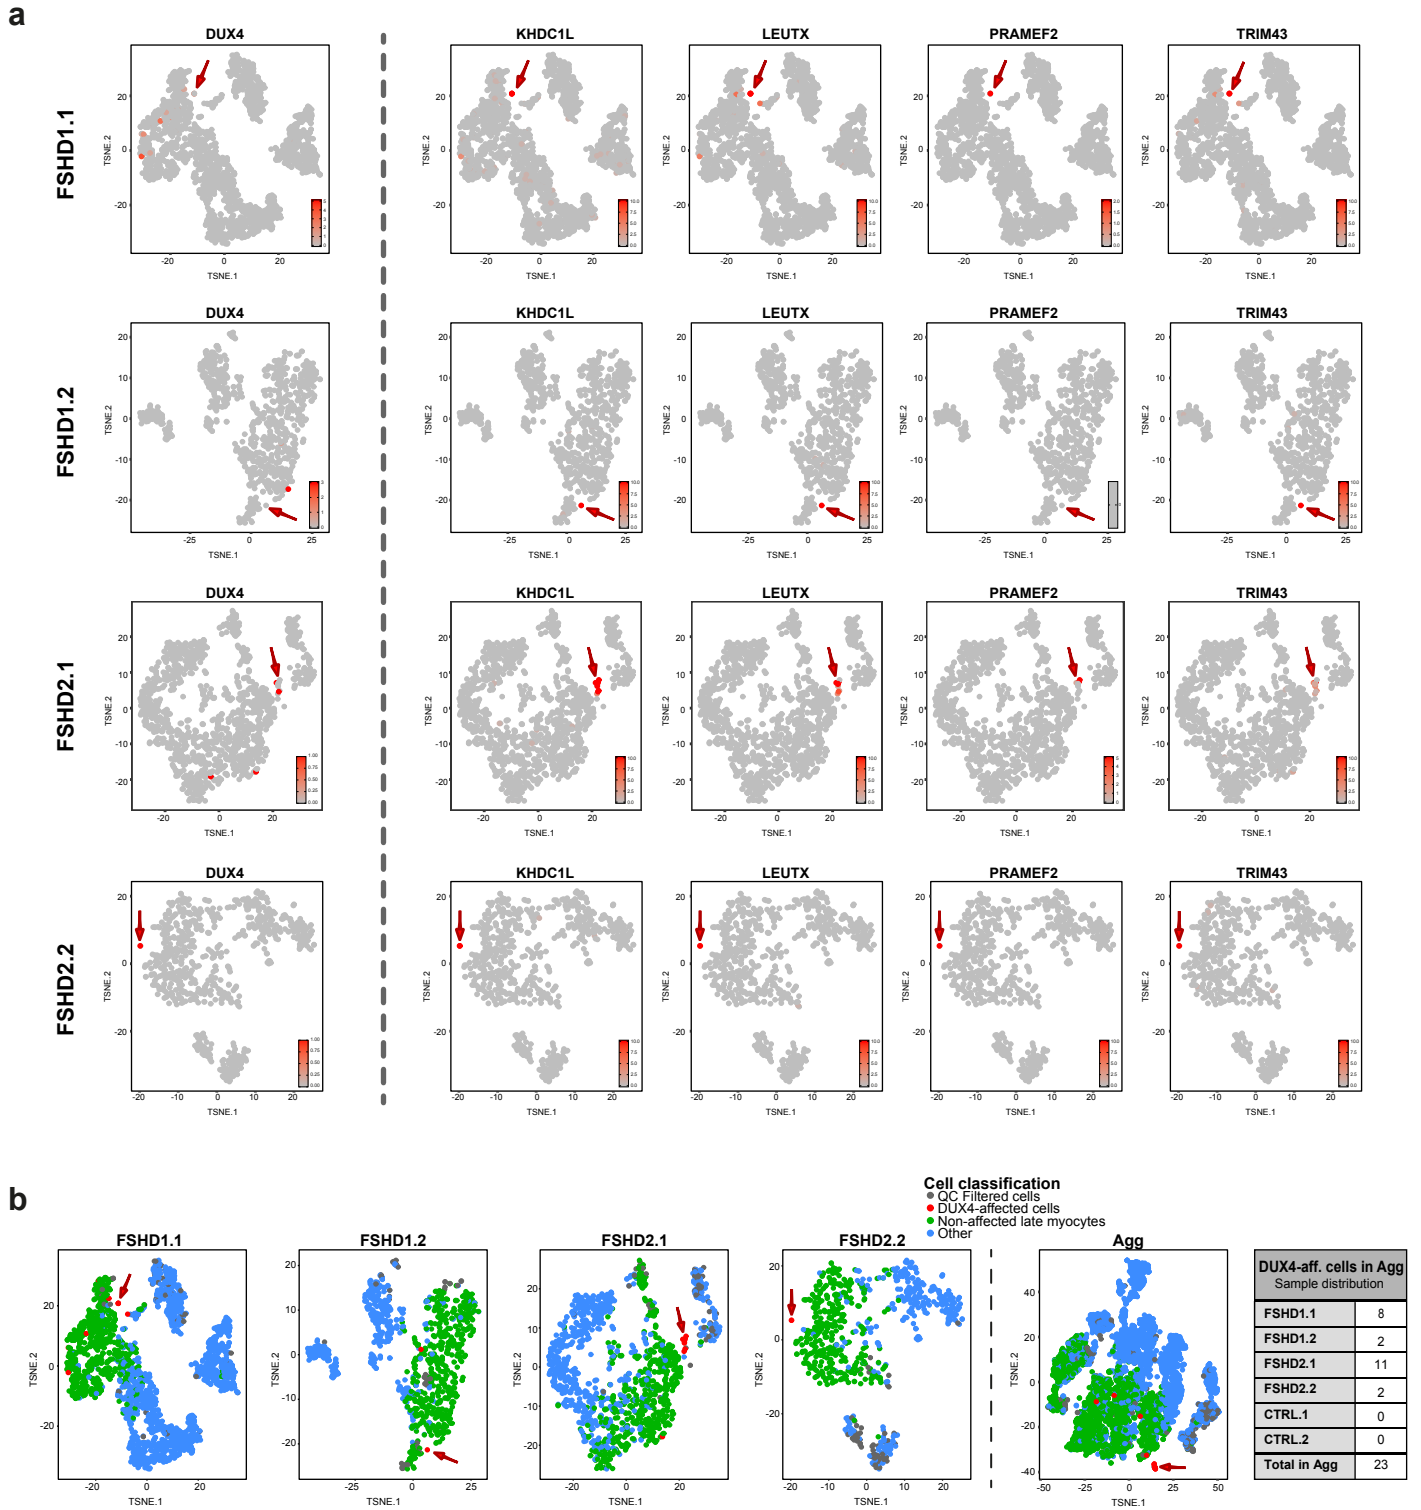

**Figure S4. Expression patterns of DUX4 and four DUX4 biomarkers per sample.**

**a)** t-SNE projections (Cell Ranger) of all four FSHD samples, colored based on the expression levels of DUX4 and four strong DUX4 biomarkers (4); KHDC1L, LEUTX, PRAMEF2 and TRIM43. Color-scales depict the normalized expression levels for each specified gene. None of these genes were found to be expressed in the two control samples (not shown). The red arrow highlights the cluster of DUX4-affected cells identified in all four FSHD samples based on expressed DUX4 biomarker count. **b)** t-SNE projections of all four FSHD samples and the Agg dataset, colored by the cell classification based on DUX4 biomarker expression and myogenic state. The table includes the number of cells from all separate samples that are included in the DUX4-affected population in the Agg dataset.
