# Supplementary material
Source: PubMed Central journal article supplement (PMC6423425)
Supplement: hmg-2018-d-00737_figure_s7_revised_ddy400.pdf [file hmg-2018-d-00737_figure_s7_revised_ddy400.pdf]

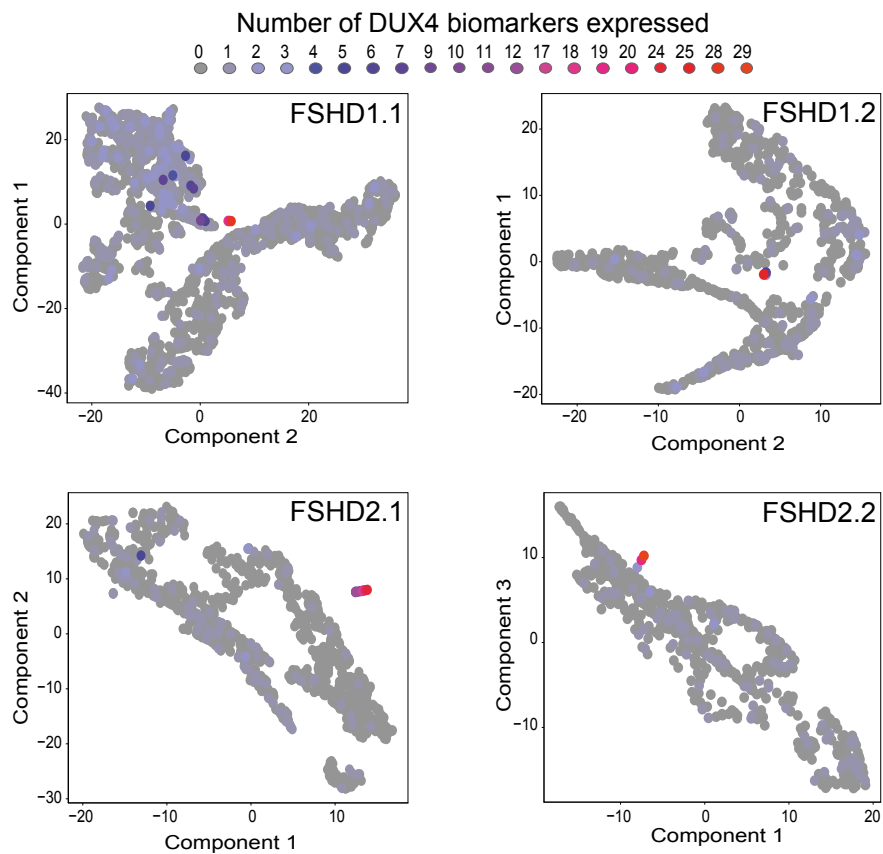

**Figure S7. PCA-based clustering discriminates the DUX4-affected cells from the non-affected late myocytes t-SNE projections of the four FSHD samples re-clustered based on PC-FSHD49 gene set.** Samples are colored by the number of DUX4 biomarkers expressed per cell. See methods for details on the re-clustering.
