# Supplementary material
Source: PubMed Central journal article supplement (PMC6423425)
Supplement: hmg-2018-d-00737_figure_s8_revised_ddy400.pdf [file hmg-2018-d-00737_figure_s8_revised_ddy400.pdf]

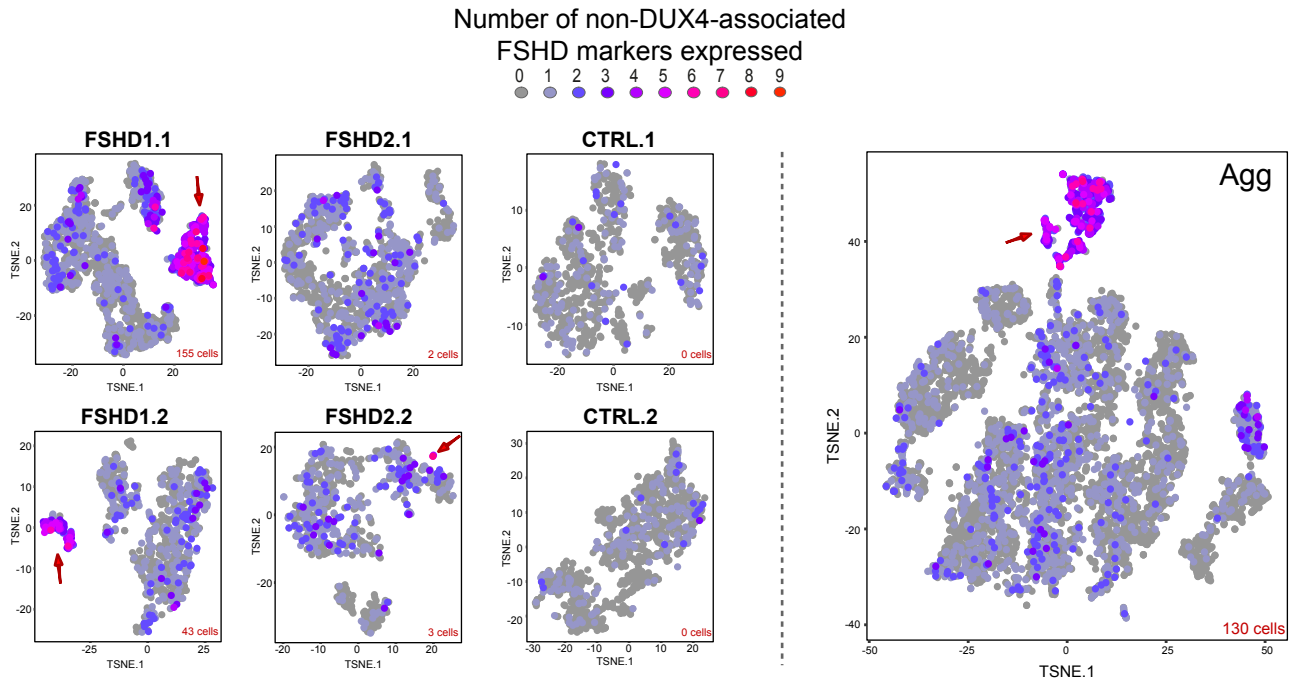

**Figure S8. scRNAseq allows for the identification of non-DUX4-associated transcriptional changes in FSHD.** t-SNE projections (Cell Ranger) of all samples, colored for the number of non-DUX4-affected FSHD-associated biomarkers being expressed per cell (86 genes previously identified by Yao et al.(4)). The affected population is highlighted with a red arrow.
