# Supplementary material
Source: PubMed Central journal article supplement (PMC6423425)
Supplement: hmg-2018-d-00737_figure_s9_revised_ddy400.pdf [file hmg-2018-d-00737_figure_s9_revised_ddy400.pdf]

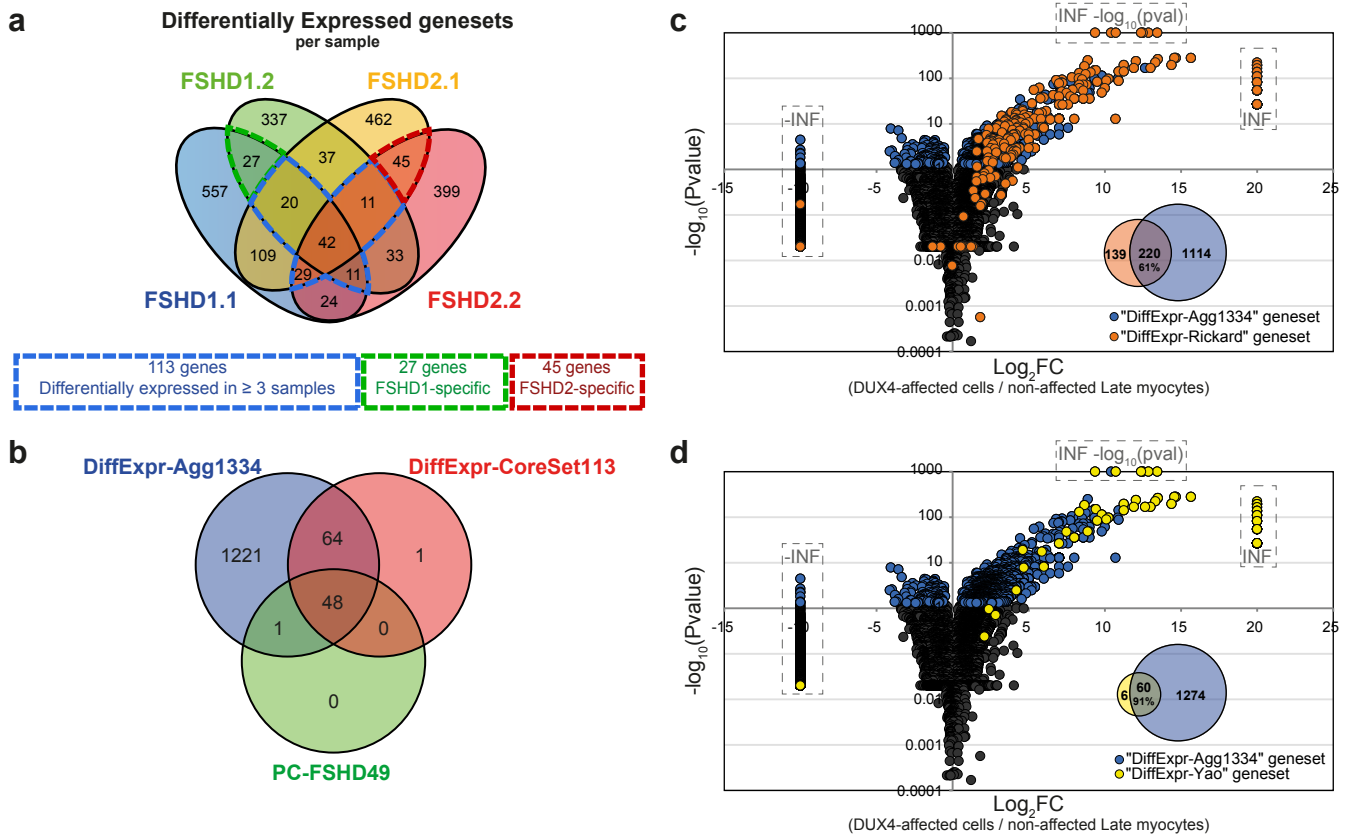

**Figure S9. The FSHD-transcriptome of primary cultures correlates well with artificial DUX4-expression or DUX4-reporter systems.**

**a)** Venn diagram depicting the overlap between the affected genes in the DUX4-affected population identified per sample. Genes identified in at least three out of four FSHD samples were selected as the DiffExpr-CoreSet113 gene set (marked by the blue dash-lined shape). Genes identified as differentially expressed exclusively in FSHD1 samples were selected as the FSHD1-Specific27 gene set (marked by the green dash-lined shape). Genes identified as differentially expressed exclusively in FSHD2 samples were selected as the FSHD2-Specific45 gene set (marked by the red dash-lined shape) (see also Table S3). **b)** Venn diagram depicting the overlap between the genes found differentially expressed in the DUX4-affected population in i) the Agg dataset (DiffExpr-Agg1334), ii) the core set of genes found differentially expressed in at least three of the four FSHD samples (DiffExpr-CoreSet113) iii) and the FSHD-specific PC genes (PC-FSHD49). **c)** Vulcanoplot as in Figure 3B, in which highlighted all genes that are identified as DUX4-affected by Rickard et al.(12) and that are detected in our data (DiffExpr-Rickard, see Table S3). **d)** Vulcanoplot as in Figure 3B, in which highlighted all genes that are identified as DUX4-affected by Yao et al.(4) and that are detected in our data (DiffExpr-Yao, see Table S3). Inset venn diagrams depict the overlap between the affected genes in the DUX4-affected population of the Agg dataset (DiffExpr-Agg1334) and the gene set highlighted in the respective vulcanoplot (genes not detected in our Agg dataset excluded). The percentage indicates the percentage overlap of the highlighted gene set.
